# Supplementary material for: Retrospective analysis of SGLT2 inhibitors in heart failure with preserved ejection fraction
Source: PubMed Central journal article supplement — ESC Heart Fail. 2023 Apr 11;10(3):2010–8. doi: 10.1002/ehf2.14347 (PMC10192275; doi:10.1002/ehf2.14347), 2023-04-11
Supplement: EHF2-10-2010-s001.pdf [file EHF2-10-2010-s001.pdf]

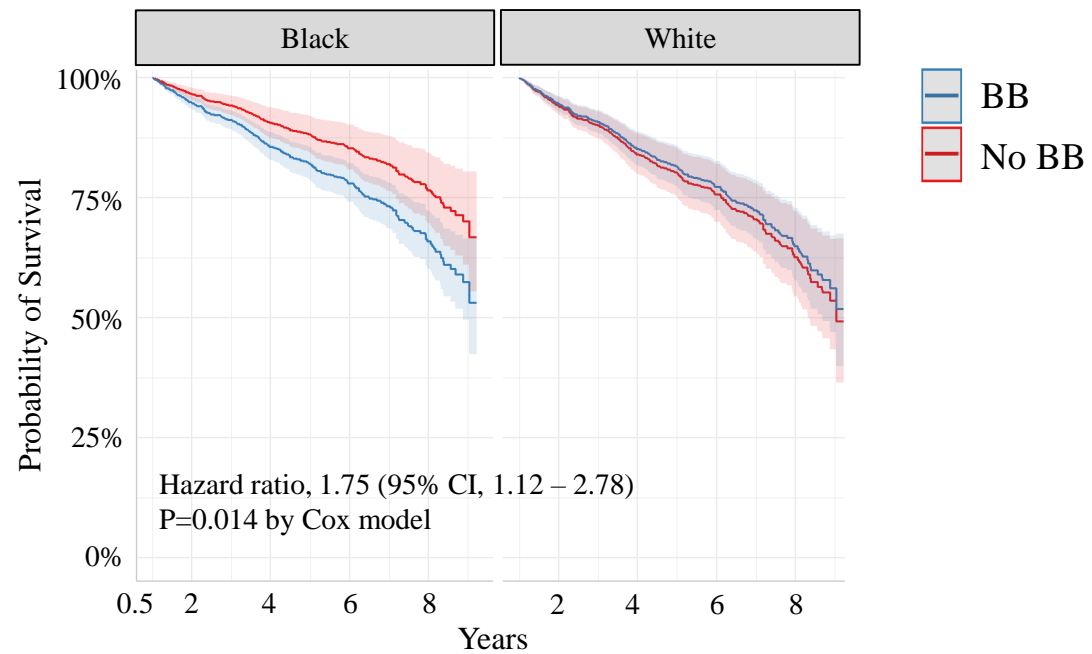

Supplementary Figure S1. Survival in black and white patients with heart failure with preserved ejection fraction treated with and without a beta blocker after adjusting for age, sex, hypertension, chronic kidney disease, and type 2 diabetes
