# Supplementary material for: Retrospective analysis of SGLT2 inhibitors in heart failure with preserved ejection fraction
Source: PubMed Central journal article supplement — ESC Heart Fail. 2023 Apr 11;10(3):2010–8. doi: 10.1002/ehf2.14347 (PMC10192275; doi:10.1002/ehf2.14347), 2023-04-11
Supplement: EHF2-10-2010-s002.pdf [file EHF2-10-2010-s002.pdf]

Table S1. Types of insurance among white and black HFpEF patients with or without chronic kidney disease

| Insurance    | All<br>(n=2368) | White            |                        | Black            |                        |
|--------------|-----------------|------------------|------------------------|------------------|------------------------|
|              |                 | HFpEF<br>(n=488) | HFpEF + CKD<br>(n=490) | HFpEF<br>(n=505) | HFpEF + CKD<br>(n=850) |
| Private (%)  | 14              | 15               | 10*                    | 21 <sup>#</sup>  | 11*                    |
| Medicare (%) | 65              | 68               | 75*                    | 48 <sup>#</sup>  | 69 <sup>#</sup>        |
| Medicaid (%) | 14              | 7                | 8                      | 22 <sup>#</sup>  | 17 <sup>#</sup>        |
| Self-pay (%) | 8               | 9                | 7                      | 11               | 6*                     |
| None (%)     | 2               | 2                | 3                      | 2                | 1                      |

HFpEF indicates heart failure with preserved ejection fraction; CKD, chronic kidney disease before or during follow-up; \*p < 0.05 vs. HFpEF, #p<0.05 vs. White.
